# Supplementary material
Source: PubMed Central journal article supplement (PMC8405198)
Supplement: advancesADV2021004201-suppl1.pdf [file advancesADV2021004201-suppl1.pdf]

## **Supplemental Information**

**Manuscript Title:** The predictive value of PNH clones, 6p CN-LOH, and clonal TCR gene rearrangement for aplastic anemia diagnosis

**Running Head:** Improved diagnostic algorithm for AA

**Authors:** Yash B. Shah<sup>1</sup>, Salvatore F. Priore<sup>2</sup>, Yimei Li<sup>3</sup>, Chi N. Tang<sup>2</sup>, Peter Nicholas<sup>1</sup>, Peter Kurre<sup>1</sup>, Timothy S. Olson<sup>1,4</sup>, Daria V. Babushok<sup>1,5</sup>

<sup>1</sup> Comprehensive Bone Marrow Failure Center, Children's Hospital of Philadelphia, Philadelphia, Pennsylvania, USA

<sup>2</sup> Division of Precision and Computational Diagnostics, Department of Pathology and Laboratory Medicine, Hospital of the University of Pennsylvania, Philadelphia, Pennsylvania, USA

<sup>3</sup> Department of Biostatistics, Epidemiology and Informatics, Perelman School of Medicine at the University of Pennsylvania, Philadelphia, PA

<sup>4</sup> Division of Oncology, Department of Pediatrics, Children's Hospital of Philadelphia, Philadelphia, Pennsylvania, USA

<sup>5</sup> Division of Hematology-Oncology, Department of Medicine, Hospital of the University of Pennsylvania, Philadelphia, Pennsylvania, USA

### **Corresponding Author:**

Daria Babushok, M.D. Ph.D.

Division of Hematology-Oncology, Department of Medicine, Hospital of the University of Pennsylvania, Philadelphia, Pennsylvania

Room 808 BRB II/III, 421 Curie Blvd, Philadelphia, PA 19104

Email: [daria.babushok@penndmedicine.upenn.edu](mailto:daria.babushok@penndmedicine.upenn.edu)

Phone: 215-614-1847, Fax: 215-615-5888

**Keywords:** aplastic anemia, inherited bone marrow failure, PNH, IBMFS, 6pLOH, 6p CN-LOH, TCR gene rearrangement, clonal hematopoiesis, clinical decision making

## **Table of Contents**

|                                                                                                                                                       |           |
|-------------------------------------------------------------------------------------------------------------------------------------------------------|-----------|
| <b>Data Sharing Statement .....</b>                                                                                                                   | <b>3</b>  |
| <b>Supplemental Tables.....</b>                                                                                                                       | <b>4</b>  |
| Supplemental Table S1. Demographics of 454 consecutively enrolled patients in the BMF registry.....                                                   | 4         |
| Supplemental Table S2. Genetic diagnoses for classical IBMFS patients.....                                                                            | 5         |
| Supplemental Table S3. Prevalence and size of PNH granulocyte clones by diagnostic group.....                                                         | 6         |
| Supplemental Table S4. Breakpoint coordinates of acquired 6p CN-LOH in 16 AA patients.....                                                            | 7         |
| Supplemental Table S5. Prevalence of cytogenetic abnormalities by diagnostic group.....                                                               | 8         |
| Supplemental Table S6. Associations between PNH clones, 6p CN-LOH, and clonal TCR gene rearrangement and clinical characteristics of AA patients..... | 9         |
| <b>Supplemental Figures .....</b>                                                                                                                     | <b>10</b> |
| Supplemental Figure S1. Chromosome 6 ideogram showing the location of the MHC region.....                                                             | 10        |
| <b>Supplemental References .....</b>                                                                                                                  | <b>11</b> |

## **Data Sharing Statement**

Detailed data tables with aggregated frequencies of clinical findings denoted by diagnostic group are available in the Supplemental Data.

## Supplemental Tables

Supplemental Table S1. Demographics of 454 consecutively enrolled patients in the BMF registry

| Diagnostic Group       | Patients   | Sex        |              | Race                   |             |             |                   |               | Ethnicity      |                    |               | 6p CN-LOH Median Age at Testing, Years (Range) | PNH Median Age at Testing, Years (Range) | TCR Median Age at Testing, Years (Range) |             |
|------------------------|------------|------------|--------------|------------------------|-------------|-------------|-------------------|---------------|----------------|--------------------|---------------|------------------------------------------------|------------------------------------------|------------------------------------------|-------------|
|                        | n=454      | Male n (%) | Female n (%) | African American n (%) | Asian n (%) | White n (%) | Interracial n (%) | Unknown n (%) | Hispanic n (%) | Not Hispanic n (%) | Unknown n (%) |                                                |                                          |                                          |             |
| <b>Aplastic Anemia</b> | 170        | 91 (54%)   | 79 (46%)     | 18 (11%)               | 9 (5%)      | 132 (78%)   | 6 (4%)            | 5 (3%)        | 4 (2%)         | 161 (95%)          | 5 (3%)        | 15 (0.5-80)                                    | 20 (1-81)                                | 19.5 (2-80)                              |             |
| <b>PNH Disease</b>     | 42         | 16 (38%)   | 26 (62%)     | 10 (24%)               | 1 (2%)      | 29 (69%)    | 1 (2%)            | 1 (2%)        | 2 (5%)         | 39 (93%)           | 1 (2%)        | 27 (14-80)                                     | 28 (14-80)                               | 28 (15-68)                               |             |
| <b>Classical IBMFS</b> | <b>SDS</b> | 11         | 4 (36%)      | 7 (64%)                | 0 (0%)      | 0 (0%)      | 11 (100%)         | 0 (0%)        | 0 (0%)         | 2 (18%)            | 9 (82%)       | 0 (0%)                                         | 8.5 (2-50)                               | N/A                                      | 12 (7-50)   |
|                        | <b>DC</b>  | 34         | 26 (76%)     | 8 (24%)                | 1 (3%)      | 1 (3%)      | 31 (91%)          | 0 (0%)        | 1 (3%)         | 2 (6%)             | 31 (91%)      | 1 (3%)                                         | 15 (1-60)                                | 14 (13-62)                               | 22 (3-51)   |
|                        | <b>DBA</b> | 35         | 20 (57%)     | 15 (43%)               | 6 (17%)     | 1 (3%)      | 28 (80%)          | 0 (0%)        | 0 (0%)         | 2 (6%)             | 33 (94%)      | 0 (0%)                                         | 9.5 (0.5-36)                             | 15 (N/A)                                 | 19.5 (1-35) |
|                        | <b>FA</b>  | 19         | 11 (58%)     | 8 (42%)                | 4 (21%)     | 1 (5%)      | 14 (74%)          | 0 (0%)        | 0 (0%)         | 2 (11%)            | 17 (89%)      | 0 (0%)                                         | 7.5 (4-37)                               | 25 (20-30)                               | 13.5 (4-35) |
|                        | <b>SCN</b> | 10         | 3 (30%)      | 7 (70%)                | 1 (10%)     | 0 (0%)      | 9 (90%)           | 0 (0%)        | 0 (0%)         | 2 (20%)            | 8 (80%)       | 0 (0%)                                         | 9.5 (0.5-23)                             | N/A                                      | 22 (N/A)    |
| <b>Other Inherited</b> | 38         | 21 (55%)   | 17 (45%)     | 5 (13%)                | 3 (8%)      | 28 (74%)    | 2 (5%)            | 0 (0%)        | 10 (26%)       | 28 (74%)           | 0 (0%)        | 6 (0.5-38)                                     | 18 (14-22)                               | 6 (0.5-18)                               |             |
| <b>BMF NOS</b>         | 14         | 8 (57%)    | 6 (43%)      | 1 (7%)                 | 0 (0%)      | 12 (86%)    | 0 (0%)            | 1 (7%)        | 0 (0%)         | 13 (93%)           | 1 (7%)        | 7 (0.5-44)                                     | N/A                                      | 5 (0.5-10)                               |             |
| <b>Neutropenia NOS</b> | 42         | 21 (50%)   | 21 (50%)     | 5 (12%)                | 1 (2%)      | 33 (79%)    | 1 (2%)            | 2 (5%)        | 3 (7%)         | 37 (88%)           | 2 (5%)        | 7 (0.5-47)                                     | 35 (N/A)                                 | 24 (17-47)                               |             |
| <b>MDS</b>             | 14         | 3 (21%)    | 11 (79%)     | 1 (7%)                 | 2 (14%)     | 11 (79%)    | 0 (0%)            | 0 (0%)        | 0 (0%)         | 14 (100%)          | 0 (0%)        | 17 (6-52)                                      | 22 (14-52)                               | 18 (11-52)                               |             |
| <b>Other</b>           | 25         | 15 (60%)   | 10 (40%)     | 3 (12%)                | 2 (8%)      | 20 (80%)    | 0 (0%)            | 0 (0%)        | 0 (0%)         | 25 (100%)          | 0 (0%)        | 9 (1-58)                                       | 18 (4-58)                                | 18 (5-58)                                |             |

**Supplemental Table S2. Genetic diagnoses for classical IBMFS patients**

|                            |                   | <b>Total Count<br/>n= 109</b> | <b>Mutated Gene (Affected Patients)</b> |
|----------------------------|-------------------|-------------------------------|-----------------------------------------|
| <b>Classical<br/>IBMFS</b> | <b>SDS</b>        | 11                            | <i>SBDS</i> (11)                        |
|                            | <b>DC</b>         | 34                            | <i>DKC1</i> (6)                         |
|                            |                   |                               | <i>TERC</i> (7)                         |
|                            |                   |                               | <i>TERT</i> (6)                         |
|                            |                   |                               | <i>RTEL1</i> (4)                        |
|                            |                   |                               | Unknown* (11)                           |
|                            |                   |                               | <b>DBA</b>                              |
|                            | <i>RPL11</i> (4)  |                               |                                         |
|                            | <i>RPL5</i> (4)   |                               |                                         |
|                            | <i>RPS26</i> (2)  |                               |                                         |
|                            | <i>RPL26</i> (1)  |                               |                                         |
|                            | <i>RPL35a</i> (1) |                               |                                         |
|                            | <i>RPS17</i> (1)  |                               |                                         |
|                            | <i>RPS24</i> (1)  |                               |                                         |
|                            | Unknown* (13)     |                               |                                         |
|                            | <b>FA</b>         | 19                            | <i>FANCA</i> (9)                        |
|                            |                   |                               | <i>FANCC</i> (2)                        |
|                            |                   |                               | <i>BRCA2</i> (3)                        |
|                            |                   |                               | Unknown* (5)                            |
|                            | <b>SCN</b>        | 10                            | <i>ELANE</i> (8)                        |
| Unknown* (2)               |                   |                               |                                         |

\*Patients without a confirmed genetic diagnosis were diagnosed clinically using syndrome-specific functional tests and established diagnostic criteria<sup>1</sup>.

**Supplemental Table S3. Prevalence and size of PNH granulocyte clones by diagnostic group**

| Diagnostic Group |     | PNH Granulocyte Clone Size <sup>a</sup> |                   |                     |                |                  |               |
|------------------|-----|-----------------------------------------|-------------------|---------------------|----------------|------------------|---------------|
|                  |     | Total n (%)                             | Subclinical n (%) | Small n (%)         | Moderate n (%) | Large n (%)      | Unknown n (%) |
| Aplastic Anemia  |     | 58 (46%)                                | 24 (41%)          | 18 (31%)            | 7 (12%)        | N/A <sup>b</sup> | 9 (16%)       |
| PNH Disease      |     | 42 (100%)                               | 0 (0%)            | 1 (2%) <sup>c</sup> | 0 (0%)         | 29 (69%)         | 12 (29%)      |
| Classical IBMFS  | SDS | N/A                                     | N/A               | N/A                 | N/A            | N/A              | N/A           |
|                  | DC  | 0 (0%)                                  | 0 (0%)            | 0 (0%)              | 0 (0%)         | 0 (0%)           | 0 (0%)        |
|                  | DBA | 0 (0%)                                  | 0 (0%)            | 0 (0%)              | 0 (0%)         | 0 (0%)           | 0 (0%)        |
|                  | FA  | 0 (0%)                                  | 0 (0%)            | 0 (0%)              | 0 (0%)         | 0 (0%)           | 0 (0%)        |
|                  | SCN | N/A                                     | N/A               | N/A                 | N/A            | N/A              | N/A           |
| Other Inherited  |     | 0 (0%)                                  | 0 (0%)            | 0 (0%)              | 0 (0%)         | 0 (0%)           | 0 (0%)        |
| Neutropenia NOS  |     | 0 (0%)                                  | 0 (0%)            | 0 (0%)              | 0 (0%)         | 0 (0%)           | 0 (0%)        |
| MDS              |     | 0 (0%)                                  | 0 (0%)            | 0 (0%)              | 0 (0%)         | 0 (0%)           | 0 (0%)        |
| BMF NOS          |     | N/A                                     | N/A               | N/A                 | N/A            | N/A              | N/A           |
| Other            |     | 0 (0%)                                  | 0 (0%)            | 0 (0%)              | 0 (0%)         | 0 (0%)           | 0 (0%)        |

a. Subclinical <1%, Small 1-9.99%, Moderate 10-30%, Large >30%; b. AA patients with Large clones were classified under the PNH Disease diagnostic group; c. One PNH patient has undergone spontaneous remission, as previously described<sup>2</sup>.

**Supplemental Table S4. Breakpoint coordinates of acquired 6p CN-LOH in 16 AA patients**

| <b>Patient ID</b> | <b>6p CN-LOH Region</b> | <b>Clone Size</b> | <b>HLA Class I Genes Included in 6p CN-LOH Region</b> | <b>Age at Array, years</b> |
|-------------------|-------------------------|-------------------|-------------------------------------------------------|----------------------------|
| <b>54.01</b>      | 6pterp21.31             | 10%               | A, B, C                                               | 21                         |
|                   | 6pterp21.1              | 10%               | A, B, C                                               |                            |
| <b>56.01</b>      | 6pterp21.31             | N/A               | A, B, C                                               | 14                         |
|                   | 6pterp21.1              | N/A               | A, B, C                                               |                            |
|                   | 6pterp12.1              | N/A               | A, B, C                                               |                            |
|                   | 6pterp11.1              | N/A               | A, B, C                                               |                            |
| <b>281.01</b>     | 6pterp21.33             | 50%               | A, B, C                                               | 9                          |
|                   | 6pterp21.31             | 10%               | A, B, C                                               |                            |
| <b>284.01</b>     | 6pterp21.32             | 35%               | A, B, C                                               | 48                         |
|                   | 6pterp11.1              | 15%               | A, B, C                                               |                            |
| <b>348.01</b>     | 6pterp21.31             | N/A               | A, B, C                                               | 34                         |
| <b>390.01</b>     | 6 WC                    | 20%               | A, B, C                                               | 62                         |
| <b>471.01</b>     | 6pterp21.32             | 30%               | A, B, C                                               | 16                         |
|                   | 6pterp21.31             | 45%               | A, B, C                                               |                            |
|                   | 6pterp21.2              | 15%               | A, B, C                                               |                            |
|                   | 6pterp12.1              | 10%               | A, B, C                                               |                            |
| <b>505.01</b>     | 6pterp21.31             | 5%                | A, B, C                                               | 8                          |
|                   | 6pterp12.1              | 5%                | A, B, C                                               |                            |
| <b>564.01</b>     | 6pterp12.1              | <5%               | A, B, C                                               | 12                         |
| <b>575.01</b>     | 6pterp21.31             | 10%               | A, B, C                                               | 19                         |
| <b>597.01</b>     | 6pterp21.31             | 10%               | A, B, C                                               | 15                         |
|                   | 6pterp21.31             | 10%               | A, B, C                                               |                            |
| <b>602.01</b>     | 6pterp21.32             | N/A               | A, B, C                                               | 63                         |
| <b>626.01</b>     | 6pterp21.1              | 15%               | A, B, C                                               | 54                         |
|                   | 6pterp12.1              | 15%               | A, B, C                                               |                            |
| <b>658.01</b>     | 6pterp21.2              | 10%               | A, B, C                                               | 3                          |
| <b>672.01</b>     | 6pterp21.31             | 10%               | A, B, C                                               | 17                         |
| <b>675.01</b>     | 6pterp12.1              | 20%               | A, B, C                                               | 80                         |
|                   | 6 WC                    | 10%               | A, B, C                                               |                            |

**Supplemental Table S5. Prevalence of cytogenetic abnormalities by diagnostic group**

|                                                          | Aplastic Anemia                      | PNH Disease | Classical IBMFS |               |              |               |             | Other Inherited | Neutropenia NOS | MDS        | BMF NOS       | Other         |   |
|----------------------------------------------------------|--------------------------------------|-------------|-----------------|---------------|--------------|---------------|-------------|-----------------|-----------------|------------|---------------|---------------|---|
|                                                          |                                      |             | SDS             | DC            | DBA          | FA            | SCN         |                 |                 |            |               |               |   |
| <b>No Acquired Cytogenetic Abnormalities<sup>a</sup></b> | 149<br>(98%)                         | 23<br>(92%) | 8<br>(80%)      | 27<br>(87.1%) | 24<br>(100%) | 15<br>(88.2%) | 8<br>(100%) | 23<br>(74.2%)   | 32<br>(100%)    | 4<br>(40%) | 11<br>(84.6%) | 12<br>(63.2%) |   |
| <b>Acquired Cytogenetic Abnormalities Present</b>        | 3<br>(1.9%)                          | 2<br>(8%)   | 2<br>(20%)      | 4<br>(12.9%)  | 0<br>(0%)    | 2<br>(11.8%)  | 0<br>(0%)   | 8<br>(25.8%)    | 0<br>(0%)       | 6<br>(60%) | 2<br>(15.4%)  | 7<br>(36.8%)  |   |
| <b>Acquired Abnormality</b>                              | -7/ del(7q)                          | 0           | 0               | 1             | 0            | 0             | 0           | 0               | 3               | 0          | 3             | 0             | 1 |
|                                                          | i(7q)                                | 0           | 0               | 0             | 1            | 0             | 0           | 0               | 0               | 0          | 0             | 0             | 0 |
|                                                          | +8                                   | 1           | 1               | 0             | 0            | 0             | 0           | 0               | 0               | 0          | 1             | 1             | 0 |
|                                                          | del(13q)                             | 1           | 0               | 0             | 0            | 0             | 0           | 0               | 0               | 0          | 0             | 0             | 0 |
|                                                          | -17/ del(17p)                        | 0           | 0               | 0             | 1            | 0             | 0           | 0               | 0               | 0          | 0             | 0             | 0 |
|                                                          | del(20q)                             | 0           | 0               | 0             | 0            | 0             | 0           | 0               | 1               | 0          | 2             | 0             | 0 |
|                                                          | Other Single Or Double Abnormalities | 1           | 1               | 0             | 1            | 0             | 2           | 0               | 4               | 0          | 0             | 1             | 4 |
| Complex                                                  | 0                                    | 0           | 1               | 1             | 0            | 0             | 0           | 0               | 0               | 0          | 0             | 2             |   |
| <b>Cytogenetic Data N/A</b>                              | 18 <sup>b</sup>                      | 17          | 1               | 3             | 11           | 2             | 2           | 7               | 10              | 4          | 1             | 6             |   |
| <b>Total Cohort</b>                                      | <b>170</b>                           | <b>42</b>   | <b>11</b>       | <b>34</b>     | <b>35</b>    | <b>19</b>     | <b>10</b>   | <b>38</b>       | <b>42</b>       | <b>14</b>  | <b>14</b>     | <b>25</b>     |   |

a. Constitutional cytogenetic abnormalities were identified in 1 AA, 3 DC, and 1 DBA patients; b. 5 of 18 AA patients without available cytogenetic data had SNP-A or MDS FISH panel results that indicated no abnormalities.



**Supplemental Table S6. Associations between PNH clones, 6p CN-LOH, and clonal TRG rearrangement and clinical characteristics of AA patients**

|                                                                | <b>PNH<sup>gran</sup><br/>Positive vs. Negative</b>                                                                                               | <b>Acquired 6p CN-LOH<sup>MHC</sup><br/>Positive vs. Negative</b>                                                                                           | <b>Clonal TRG Rearrangement<br/>Positive vs. Negative</b>                                                                                                                        |
|----------------------------------------------------------------|---------------------------------------------------------------------------------------------------------------------------------------------------|-------------------------------------------------------------------------------------------------------------------------------------------------------------|----------------------------------------------------------------------------------------------------------------------------------------------------------------------------------|
| <b>Age at diagnosis (pediatric vs. adult*)</b>                 | Pediatric-onset AA: 63.7% (35 of 55 PNH <sup>gran</sup> -positive) vs. 66.7% (40 of 60 PNH <sup>gran</sup> -negative);<br>OR 0.88; p=0.845        | Pediatric-onset AA: 62.5% (10 of 16 6p CN-LOH <sup>MHC</sup> -positive) vs. 73.2% (79 of 108 6p CN-LOH <sup>MHC</sup> -negative);<br>OR 0.61; p=0.384       | <b>Pediatric-onset AA: 28.6% (4 of 14 patients with clonal TRG rearrangement) vs. 67.2% (41 of 61 patients with negative TRG clonality testing);<br/>OR 0.19; p=0.0137</b>       |
| <b>Age at Testing (pediatric vs. adult*)</b>                   | Pediatric age at testing: 58.2% (32 of 55 PNH <sup>gran</sup> -positive) vs. 61.7% (37 of 60 PNH <sup>gran</sup> -negative);<br>OR 0.86; p=0.708  | Pediatric age at testing: 56.3% (9 of 16 6p CN-LOH <sup>MHC</sup> -positive) vs. 75.0% (81 of 108 6p CN-LOH <sup>MHC</sup> -negative);<br>OR 0.43; p=0.137  | <b>Pediatric age at testing: 28.6% (4 of 14 patients with clonal TRG rearrangement) vs. 62.3% (38 of 61 patients with negative TRG clonality testing);<br/>OR 0.24; p=0.0350</b> |
| <b>Disease duration at testing (&lt;1 year vs. &gt;1 year)</b> | AA duration <1yr: 38.5% (20 of 52 PNH <sup>gran</sup> -positive) vs. 40.7% (24 of 59 PNH <sup>gran</sup> -negative);<br>OR 0.91; p=0.848          | AA duration <1yr: 43.8% (7 of 16 6p CN-LOH <sup>MHC</sup> -positive) vs. 53.7% (51 of 95 6p CN-LOH <sup>MHC</sup> -negative);<br>OR 0.67; p=0.591           | AA duration <1yr: 38.5% (10 of 14 patients with clonal TRG rearrangement) vs. 73.3% (44 of 60 patients with negative TRG clonality testing);<br>OR 0.91; p=1.000                 |
| <b>AA severity</b>                                             | NSAA n=18, SAA n=25, VSAA n=8 in PNH <sup>gran</sup> -positive vs. NSAA n=20, SAA n=22, VSAA n=17 in PNH <sup>gran</sup> -negative;<br>p=0.229    | NSAA n=4, SAA n=9, VSAA n=2 in 6p CN-LOH <sup>MHC</sup> -positive vs. NSAA n=36, SAA n=42, VSAA n=25 in 6p CN-LOH <sup>MHC</sup> -negative;<br>p=0.429      | NSAA n=4, SAA n=8, VSAA n=1 in patients with clonal TRG rearrangement vs. NSAA n=11, SAA n=29, VSAA n=19 in patients with negative TRG clonality testing;<br>p=0.166             |
| <b>BM cellularity at AA diagnosis</b>                          | <b>BM cellularity ≤ 5%: 27.8% (15 of 54 PNH<sup>gran</sup>-positive) vs. 51.7% (31 of 60 PNH<sup>gran</sup>-negative);<br/>OR 0.360; p=0.0128</b> | BM cellularity ≤ 5%: 50.0% (8 of 16 of 6p CN-LOH <sup>MHC</sup> -positive) vs. 38.7% (41 of 106 of 6p CN-LOH <sup>MHC</sup> -negative);<br>OR 1.59; p=0.429 | BM cellularity ≤ 5%: 50.0% (4 of 8 patients with clonal TRG rearrangement) vs. 38.7% (23 of 59 patients with negative TRG clonality testing);<br>OR 1.57; p=0.705                |

\*Pediatric age was defined according to the American Academy of Pediatrics as 21 years or younger.

## Supplemental Figures

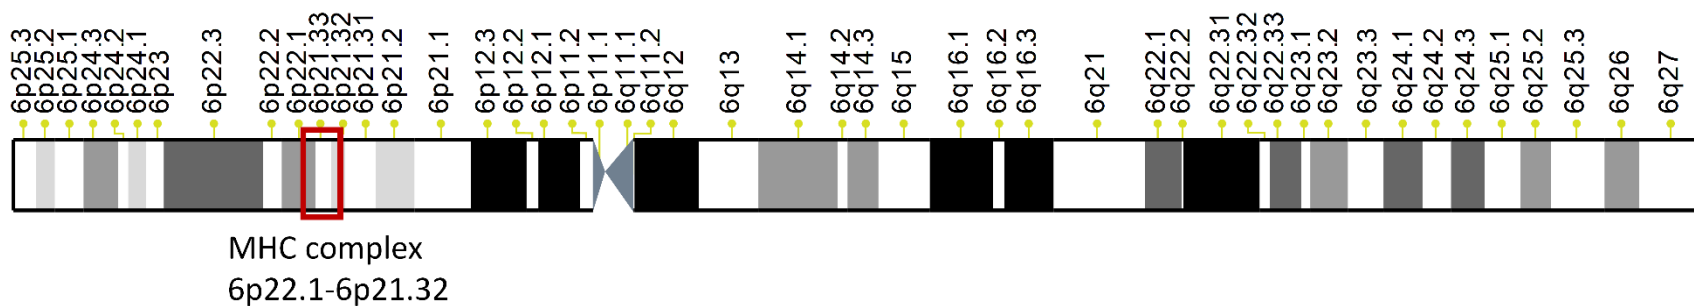

### Supplemental Figure S1. Chromosome 6 ideogram showing the location of the MHC region

HLA genes are located within the MHC region of the short arm of chromosome 6. HLA-A is located at 6p22.1 while HLA-B and HLA-C are located at 6p22.33.

## Supplemental References

1. Wilson DB, Link DC, Mason PJ, Bessler M. Inherited bone marrow failure syndromes in adolescents and young adults. *Ann Med.* 2014;46(6):353-363.
2. Babushok DV, Stanley N, Xie HM, et al. Clonal Replacement Underlies Spontaneous Remission in Paroxysmal Nocturnal Haemoglobinuria. *Br J Haematol.* 2017;176(3):487-490.
